# Supplementary material for: R-loops and nicks initiate DNA breakage and genome instability in non-growing Escherichia coli
Source: PubMed Central journal article supplement — Nat Commun. 2013 Jul 5;4:2115. doi: 10.1038/ncomms3115 (PMC3715873; doi:10.1038/ncomms3115), 2013-07-05
Supplement: ncomms3115-s1.pdf [file ncomms3115-s1.pdf]

**Supplementary Table S1. R-loop-promoted mutagenesis requires Tral ssDNA endonuclease.**

| Genotype: | Mutation Rate (Lac <sup>+</sup> colonies per 10 <sup>8</sup> viable cells per day, days 2 to 7) |              |              |                    | Effect of <i>ΔrnhA</i> in <i>tral</i> cells ( <i>Δtral ΔrnhA /Δtral</i> ) | Requirement for Tral in <i>Δrnh</i> cells (mutation rate <i>ΔrnhA / Δtral ΔrnhA</i> ) | Requirement for Tral in WT cells (mutation rate WT / <i>Δtral</i> ) | Effect of <i>ΔrnhA</i> in WT cells ( <i>ΔrnhA / WT</i> ) |
|-----------|-------------------------------------------------------------------------------------------------|--------------|--------------|--------------------|---------------------------------------------------------------------------|---------------------------------------------------------------------------------------|---------------------------------------------------------------------|----------------------------------------------------------|
|           | Wild-type                                                                                       | <i>ΔrnhA</i> | <i>Δtral</i> | <i>Δtral ΔrnhA</i> |                                                                           |                                                                                       |                                                                     |                                                          |
| Strain:   | SMR<br>4562                                                                                     | PJH<br>683   | PJH<br>234   | PJH<br>963         |                                                                           |                                                                                       |                                                                     |                                                          |
| Exp 1     | 136                                                                                             | 271          | 2.36         | 5.28               | 2.24                                                                      | 51.3                                                                                  | 57.6                                                                | 1.99                                                     |
| Exp 2     | 230                                                                                             | 679          | 2.74         | 3.51               | 1.28                                                                      | 193                                                                                   | 83.9                                                                | 2.95                                                     |
| Exp 3     | 75.8                                                                                            | 261          | 2.06         | 3.76               | 1.81                                                                      | 69.4                                                                                  | 36.8                                                                | 3.44                                                     |
| Mean      | 147                                                                                             | 404          | 2.4          | 4.2                | 1.8                                                                       | <b>108</b>                                                                            | <b>60</b>                                                           | 2.8                                                      |
| SEM       | 45                                                                                              | 138          | 0.2          | 0.6                | 0.3                                                                       | 32                                                                                    | 14                                                                  | 0.4                                                      |

Mutagenesis promoted by R-loops in RNase H-defective cells requires Tral ssDNA endonuclease.

**Supplementary Table S2. R-loop-promoted GamGFP foci in F require Tral ssDNA endonuclease.**

| <b>Genotype</b>                            | <b>Number of cells counted</b> | <b>% of cells showing one or more GamGFP foci</b> |
|--------------------------------------------|--------------------------------|---------------------------------------------------|
| F <sup>-</sup>                             | 2117                           | 6.3 ± 0.9                                         |
| F <sup>'</sup>                             | 2970                           | 24 ± 2                                            |
| F <sup>'</sup> Δ <i>tral</i>               | 3095                           | 8 ± 2                                             |
| Δ <i>rnhA</i> F <sup>-</sup>               | 1182                           | 38 ± 4                                            |
| Δ <i>rnhA</i> F <sup>'</sup>               | 1785                           | 73 ± 2                                            |
| Δ <i>rnhA</i> F <sup>'</sup> Δ <i>tral</i> | 2317                           | 50 ± 2                                            |

**Supplementary Table S3. *Escherichia coli* K12 strains used in this study.**

| Strain   | Relevant genotype                                                                                                                                    | Source                                            |
|----------|------------------------------------------------------------------------------------------------------------------------------------------------------|---------------------------------------------------|
| FC29     | $\Delta(lac-proB)XIII ara thi [F'\Delta(lacI-lacZ)]$                                                                                                 | Ref. 29                                           |
| FC36     | $\Delta lac-proB)XIII ara thi Rif^R$                                                                                                                 | Ref. 29                                           |
| SMR4562  | $\Delta lac-proB)XIII ara thi Rif^R [F' lacI33\Omega lacZ proAB^+]$                                                                                  | Ref 61. Independent construction of FC40, Ref. 29 |
| SMR5830  | SMR4562 <i>dinB10</i> [F' <i>dinB10</i> ]                                                                                                            | Ref. 43                                           |
| SMR5975  | SMR4562 [F' <i>codA21miniTn7Kan</i> (I-SceI cutsite)]                                                                                                | Ref. 21                                           |
| SMR6272  | SMR4562 $\Delta araBAD567$                                                                                                                           | Ref. 21                                           |
| SMR6276  | SMR4562 $\Delta araBAD567 \Delta att\lambda::P_{BAD}$ I-SceI                                                                                         | Ref. 21                                           |
| SMR6280  | SMR4562 $\Delta araBAD567 [F' mhpA32miniTn7Kan$ (I-SceI cutsite)]                                                                                    | Ref. 21                                           |
| SMR14015 | FC36 $\Delta araBAD567 \Delta zfd2509.2::P_{N25}tetRFRT \Delta attTn7::FRTcatFRT P_{N25tetO}gamGFP$                                                  | This work                                         |
| SMR16387 | SMR4562 $\Delta araBAD567 \Delta zfd2509.2::P_{N25}tetRFRT \Delta attTn7::FRTcatFRT P_{N25tetO}gam-gfp$                                              | This work                                         |
| SMR16389 | SMR4562 $\Delta araBAD567 \Delta zfd2509.2::P_{N25}tetRFRT \Delta attTn7::FRTcatFRT P_{N25tetO}gam-gfp \Delta rnhA::FRTKanFRT$                       | This work                                         |
| SMR16475 | SMR4562 $\Delta araBAD567 \Delta zfd2509.2::P_{N25}tetRFRT \Delta attTn7::FRTcatFRT P_{N25tetO}gam-gfp [F'\Delta tral::dhfr]$                        | This work                                         |
| SMR16477 | SMR4562 $\Delta araBAD567 \Delta zfd2509.2::P_{N25}tetRFRT \Delta attTn7::FRTcatFRT P_{N25tetO}gam-gfp \Delta rnhA::FRTKanFRT [F'\Delta tral::dhfr]$ | This work                                         |
| SMR16379 | FC36 $\Delta araBAD567 \Delta zfd2509.2::P_{N25}tetRFRT \Delta attTn7::FRTcatFRT P_{N25tetO}gam-gfp \Delta rnhA::FRTKanFRT$                          | This work                                         |
| PJH234   | SMR4562 $\Delta tral::dhfr$                                                                                                                          | This work                                         |
| PJH683   | SMR4562 $\Delta rnhA::FRTKanFRT$                                                                                                                     | This work                                         |
| PJH791   | SMR4562 <i>dinB10</i> $\Delta rnhA::FRTKanFRT$                                                                                                       | This work                                         |
| PJH795   | SMR4562 <i>dinB10</i> $\Delta mfd::FRTKanFRT$                                                                                                        | This work                                         |
| PJH813   | SMR4562 $\Delta mfd::FRTKanFRT$                                                                                                                      | This work                                         |

|         |                                                                                                             |                              |
|---------|-------------------------------------------------------------------------------------------------------------|------------------------------|
| PJH946  | SMR4562 $\Delta mfd::FRTKanFRT \Delta rnhA::FRTKanFRT$                                                      | This work                    |
| PJH963  | SMR4562 $\Delta tral::dhfr \Delta rnhA::FRTKanFRT$                                                          |                              |
| PJH1089 | SMR4562 $\Delta araBAD567 \Delta rnhA::FRTKanFRT$                                                           | This work                    |
| PJH1091 | SMR6272 [pBAD18]                                                                                            | SMR6272 x pBAD18             |
| PJH1093 | SMR6272 [pBAD18 <i>rnhA</i> ]                                                                               | SMR6272 x pBAD18 <i>rnhA</i> |
| PJH1237 | SMR6276 [pBAD18]                                                                                            | SMR6276 x pBAD18             |
| PJH1239 | SMR6276 [pBAD18 <i>rnhA</i> ]                                                                               | SMR6276 x pBAD18 <i>rnhA</i> |
| PJH1319 | SMR6280 [pBAD18]                                                                                            | SMR6280 x pBAD18             |
| PJH1321 | SMR6280 [pBAD18 <i>rnhA</i> ]                                                                               | SMR6280 x pBAD18 <i>rnhA</i> |
| SMR5383 | FC29 $\Delta ara714$ [pRDK35]                                                                               | Rosenberg collection         |
| PJH2023 | SMR4562 $\Delta attTn7::P_{N25tetO}gam-gfpFRT$<br>$\Delta zfd2509.2::P_{N25tet}RFRT$                        | This work                    |
| PJH2439 | SMR4562 $\Delta rnhA::FRTKanFRT$<br>$\Delta zfd2509.2::P_{N25tet}RFRT$                                      | This work                    |
| PJH2443 | SMR4562 $\Delta attTn7::P_{N25tetO}gam-gfpFRT$<br>$\Delta rnhA::FRTKanFRT \Delta zfd2509.2::P_{N25tet}RFRT$ | This work                    |

### Supplementary Reference

- 61 McKenzie, G. J., Harris, R. S., Lee, P. L. & Rosenberg, S. M. The SOS response regulates adaptive mutation. *Proc Natl Acad Sci U S A* **97**, 6646-6651, (2000).
